# Supplementary material
Source: Research Square preprint supplement (doi:10.21203/rs.3.rs-9562161/v1)
Supplement: Supplementary file 1 [file a60edb96abf49d213b3b0adc.pdf]

# 1 Supplementary Figures

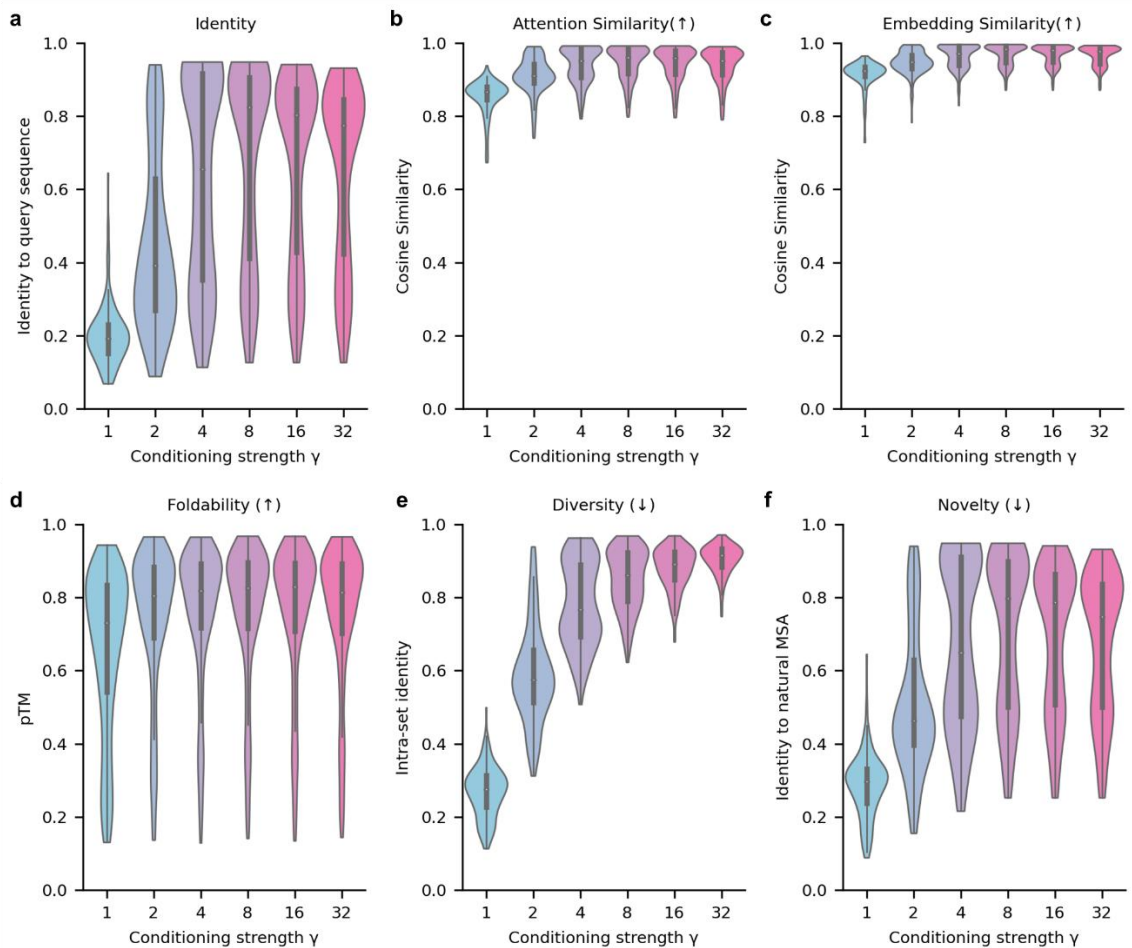

2

## 3 **Supplementary Fig. S1. Effects of conditioning strength on sequence similarity,** 4 **foldability, diversity, and novelty in EvoGUD.**

5 Violin plots summarize sequence- and structure-level statistics of EvoGUD-generated  
6 sequences as a function of the conditioning strength  $\gamma$ . Each violin represents 159 targets  
7 from the RecentPDB-monomer test set; for each target, the plotted value corresponds to  
8 the median across 1,024 generated sequences. Sequences were generated under an  
9 identity filter of 0.05–0.95 relative to the query sequence.

10 (a) sequence identity to the query sequence (same data as Fig. 1d, shown here for  
11 reference alongside other generation statistics); (b) cosine similarity between attention  
12 maps of generated sequences and the query, computed from the ESM2-3B model; (c)  
13 cosine similarity between ESM2-3B embeddings of generated sequences and the query;  
14 (d) foldability measured by predicted TM-score (pTM) from ESMFold; (e) intra-set  
15 diversity quantified as the mean pairwise sequence identity among generated sequences;  
16 (f) novelty measured as the maximum sequence identity of each generated sequence to  
17 the closest natural homolog in the corresponding natural MSA.

18 Metrics annotated with  $\uparrow$  or  $\downarrow$  indicate whether higher or lower values are desirable for  
19 the intended objective. Distributions reflect variation across targets at each  $\gamma$ , illustrating  
20 how conditioning strength controls the trade-off between similarity to the query,  
21 structural confidence, sequence diversity, and evolutionary novelty.

22

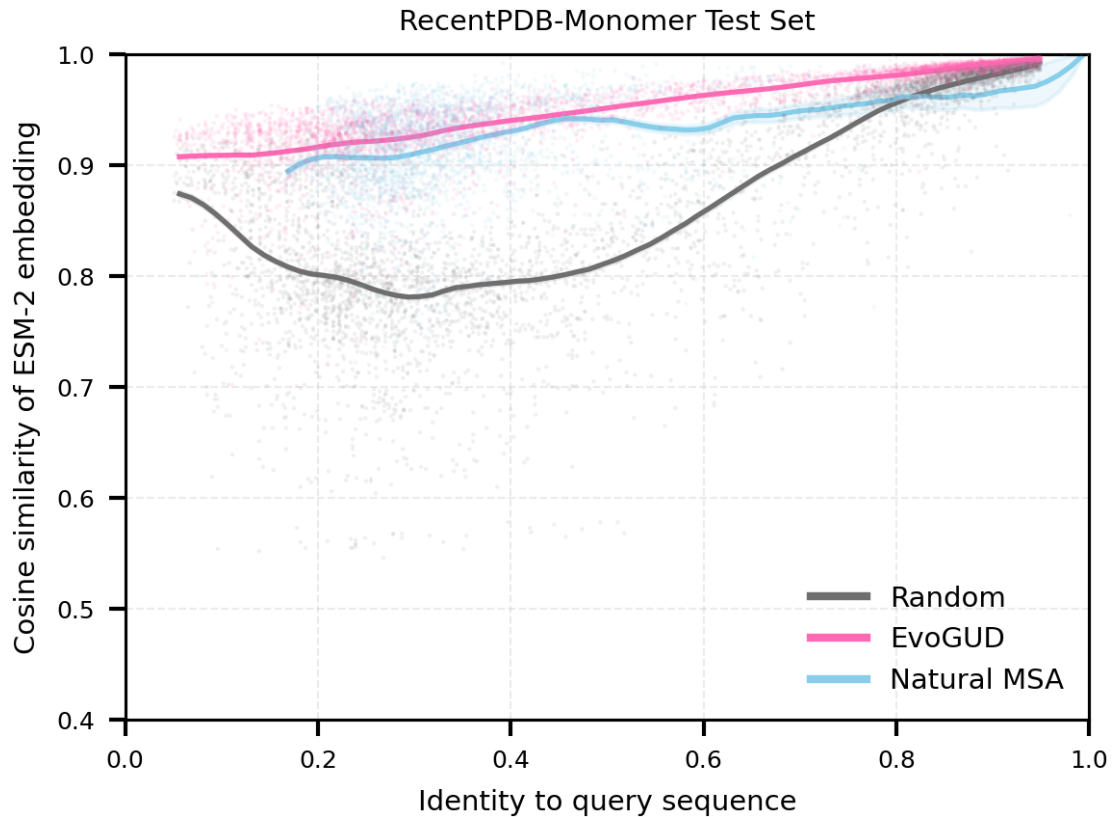

23

24 **Supplementary Fig. S2. Relationship between sequence identity and embedding**  
 25 **similarity for EvoGUD-generated, natural, and random mutated sequences.**

26 Scatter plot showing the relationship between sequence identity to the query (x-axis) and  
 27 cosine similarity of ESM-2 embeddings (y-axis). EvoGUD data points correspond to  
 28 1,024 generated sequences per target across 159 RecentPDB-monomer proteins and six  
 29 conditioning strengths ( $\gamma \in \{1, 2, 4, 8, 16, 32\}$ ), using the same generated sequences as  
 30 in Fig. 1d and Supplementary Fig. S1c. Natural MSA sequences were included only when  
 31 covering at least 80% of query positions to ensure comparable alignment context. Solid  
 32 lines denote mean trends and shaded regions indicate 95% confidence intervals.

33

34

35

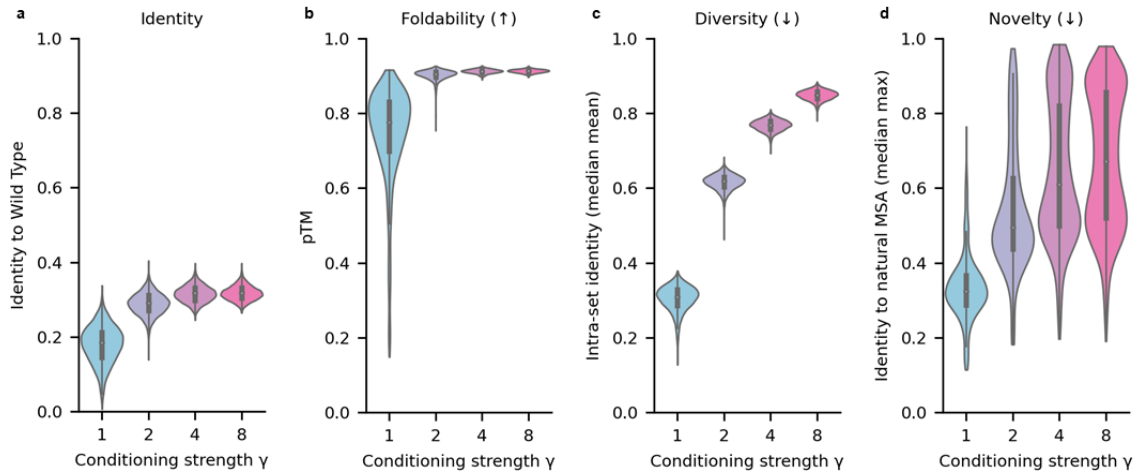

36

37 **Supplementary Fig. S3. Selection of EvoGUD conditioning strength for Tada**

38 **generation.**

39 a, Pairwise identity to WT. b, Predicted complex confidence quantified by ipTM. c, Intra-  
 40 set identity (mean), reported as an inverse proxy for diversity (lower intra-set identity  
 41 indicates higher diversity). d, Identity to natural homologs (maximum identity), reported  
 42 as an inverse proxy for novelty (lower identity indicates higher novelty).

43

44

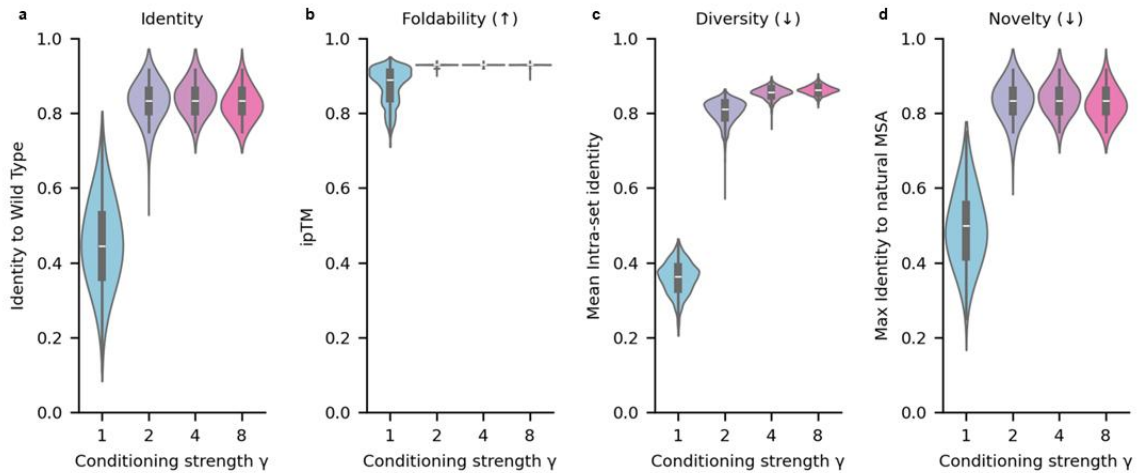

45

46 **Supplementary Fig. S4. Selection of EvoGUD conditioning strength for CcdA**

47 **generation.**

48 a, Pairwise identity to WT. b, Predicted complex confidence quantified by ipTM. c, Intra-

49 set identity (mean), reported as an inverse proxy for diversity (lower intra-set identity

50 indicates higher diversity). d, Identity to natural homologs (maximum identity), reported

51 as an inverse proxy for novelty (lower identity indicates higher novelty).

52

53

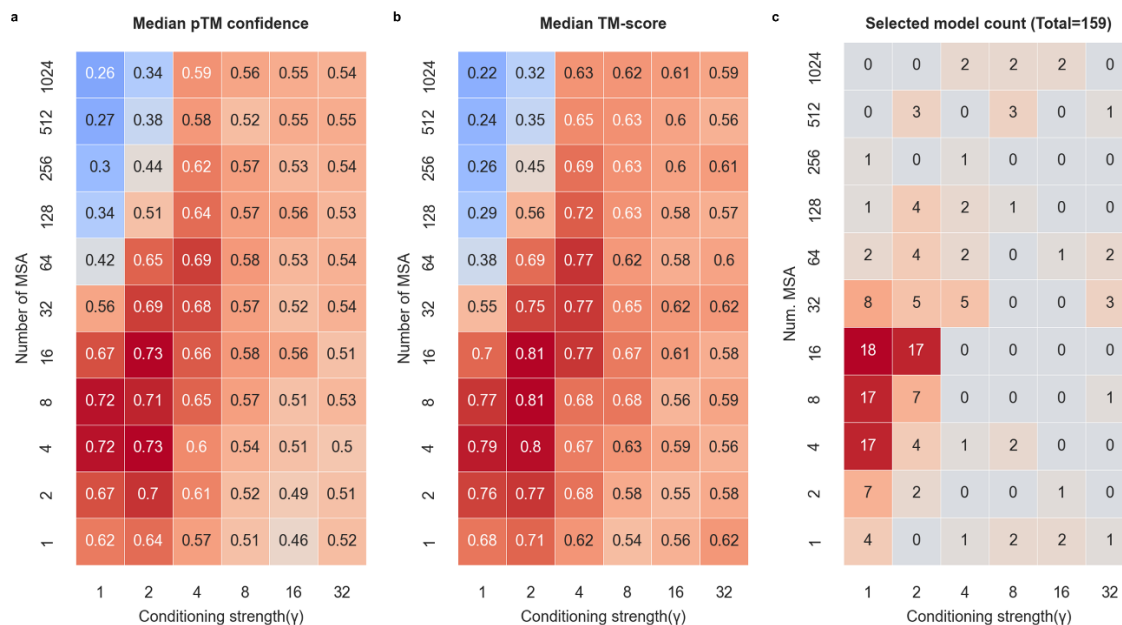

54

55 **Supplementary Fig. S5. Dependence of EvoGUD + AF3-SS performance on**  
 56 **conditioning strength and virtual MSA depth.**

57 a, Median pTM confidence scores predicted by AlphaFold3 for EvoGUD + AF3-SS  
 58 models across a grid of conditioning strengths  $\gamma$  (x-axis) and virtual MSA (vMSA) depths  
 59 (y-axis).

60 b, Corresponding median TM-scores evaluated against experimental structures.

61 c, Distribution of final model selections across the same parameter grid for the 159  
 62 monomer targets. For each target, multiple EvoGUD + AF3-SS models were generated  
 63 using different combinations of  $\gamma$  and vMSA depth, and the final model was selected  
 64 based on AlphaFold3 pTM confidence score. Cell values indicate the number of targets  
 65 whose best-scoring model originated from each parameter setting.

66 Together, these results show that optimal performance and model selection are  
67 concentrated in an intermediate regime of conditioning strength and vMSA depth,  
68 reflecting a balance between evolutionary constraint and sequence diversity.

69



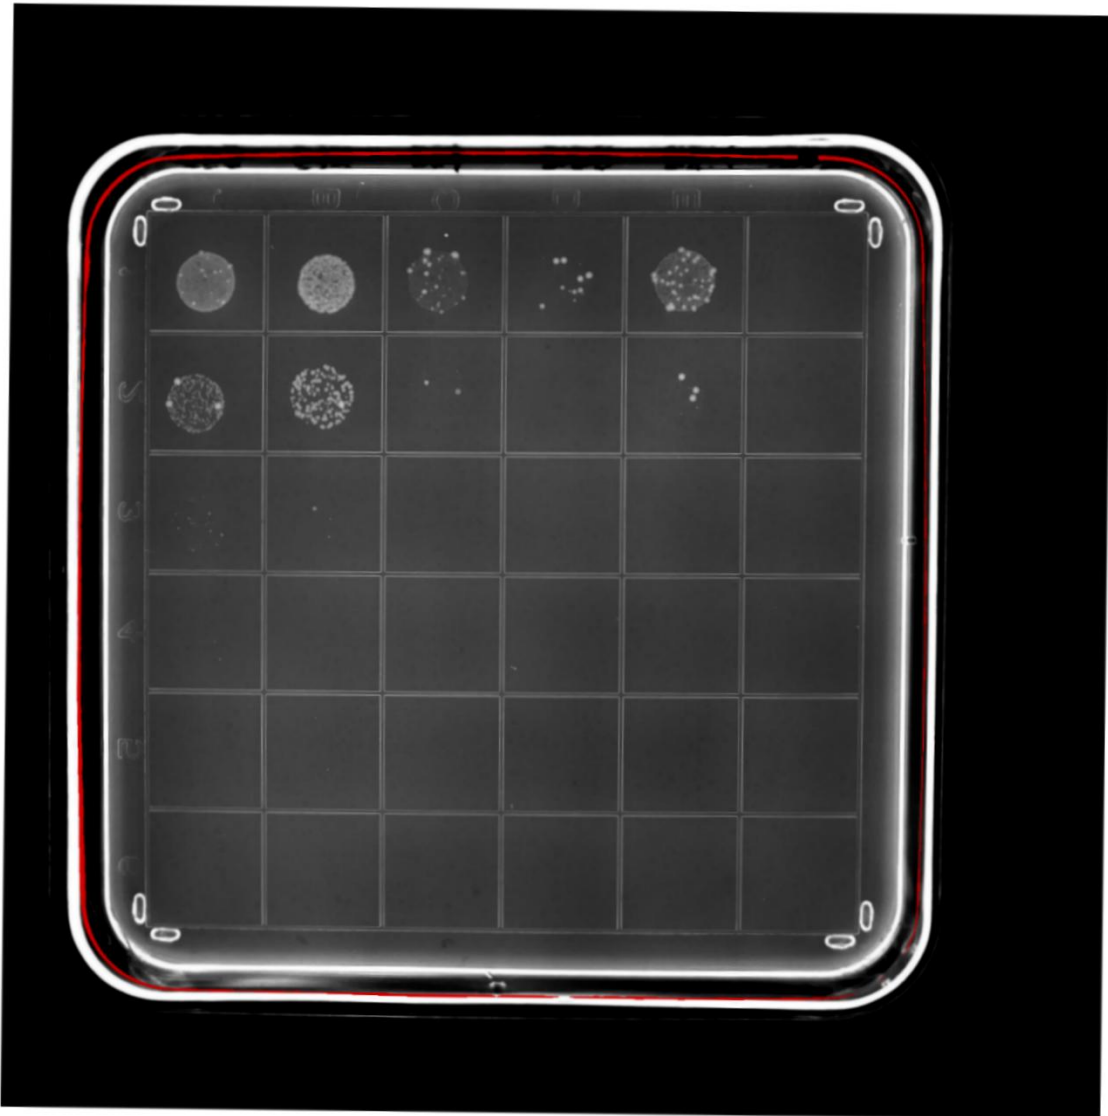

79

80 **Supplementary Fig. S7. Unedited plate images for CcdA selection (plate 2).**

81 Raw images of CcdA plate selection experiment 2. Rows (top to bottom) correspond to  
82 serial dilutions of  $10^{-2}$ ,  $10^{-3}$ ,  $10^{-4}$ ,  $10^{-5}$ , and  $10^{-6}$ . Columns (left to right) correspond to  
83 egCcdA-391 (5.66), egCcdA-509 (5.05), egCcdA-675 (4.32), egCcdA-660 (4.39),  
84 egCcdA-630 (4.51), and the CcdB-only negative control. To enable visual comparison  
85 with Supplementary Fig. S6, a uniform global brightness scaling (85%) was applied to

86 the entire image; no local adjustments, contrast enhancement, or selective editing were  
87 performed.

88

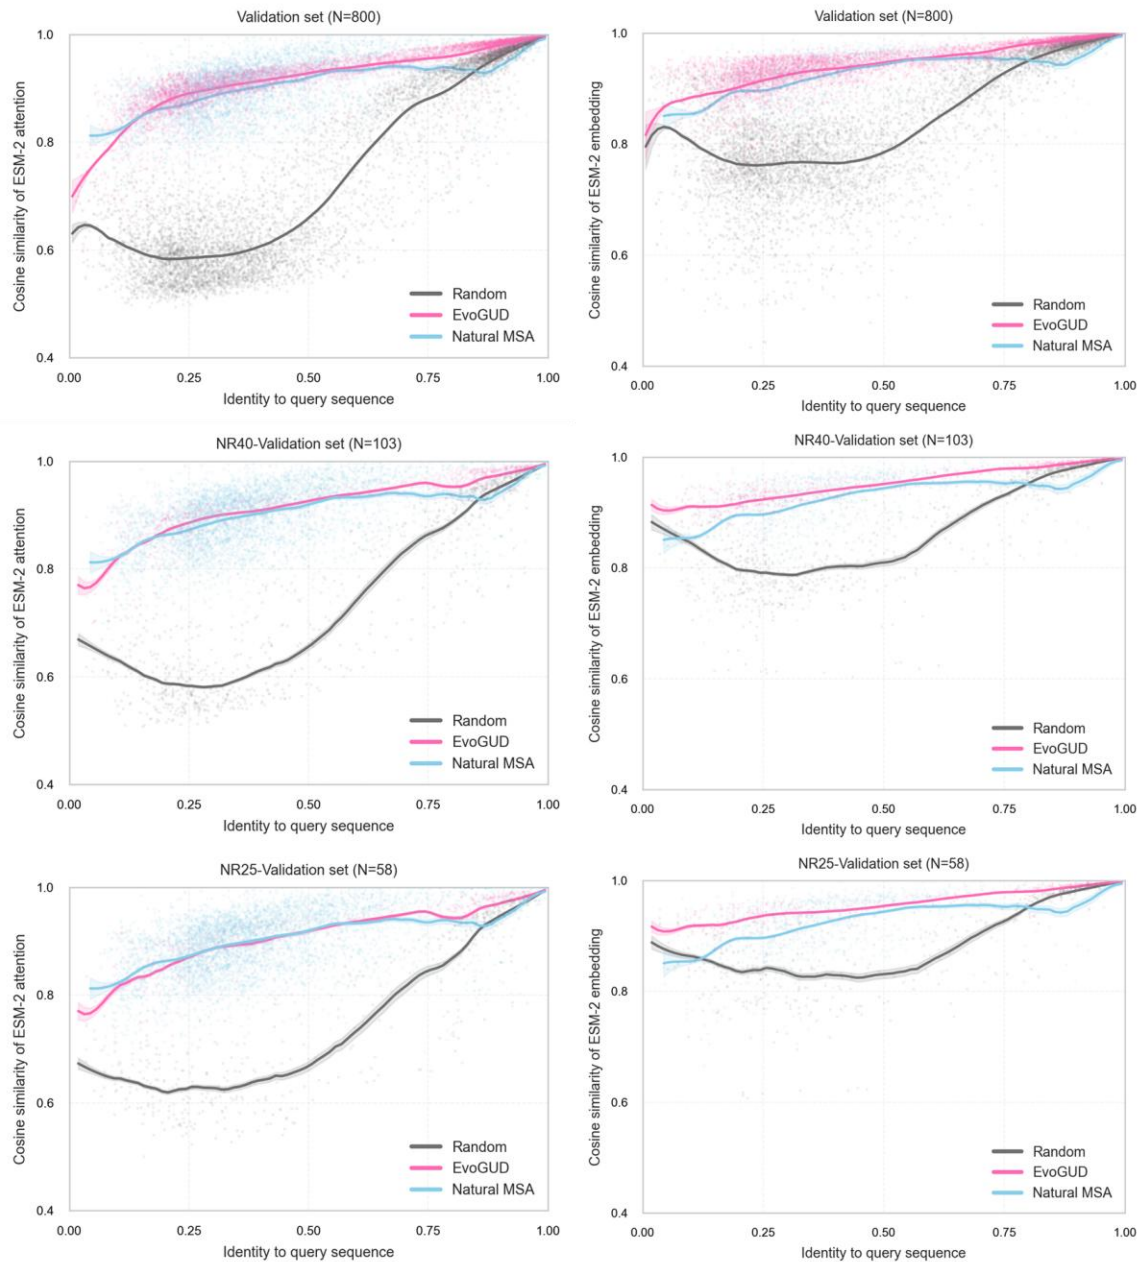

89

90 **Supplementary Fig. S8. EvoGUD preserves evolutionary representation-space**  
 91 **trajectories across homology-filtered validation sets.**

92 Scatter plots show the relationship between sequence identity to the query (x-axis) and  
 93 cosine similarity in ESM-2 representation space (y-axis) for generated and reference  
 94 sequences. Left panels report similarity in ESM-2 attention space, and right panels report  
 95 similarity in ESM-2 embedding space. Rows correspond to the full validation set (top, N

96 = 800), a non-redundant NR40 subset (middle, N = 103), and an extremely stringent  
97 NR25 subset (bottom, N = 58). Pink points and curves denote EvoGUD-generated  
98 sequences, blue denote natural MSA homologs, and gray denote identity-matched  
99 random sequences. Solid lines indicate smoothed trends, and shaded regions represent  
100 95% confidence intervals.

101 Across all validation regimes, EvoGUD-generated sequences closely follow the  
102 representation-space trajectories of natural homologs and remain well separated from  
103 random controls, independent of the evolutionary proximity between the query sequences  
104 and the training data.

105

106

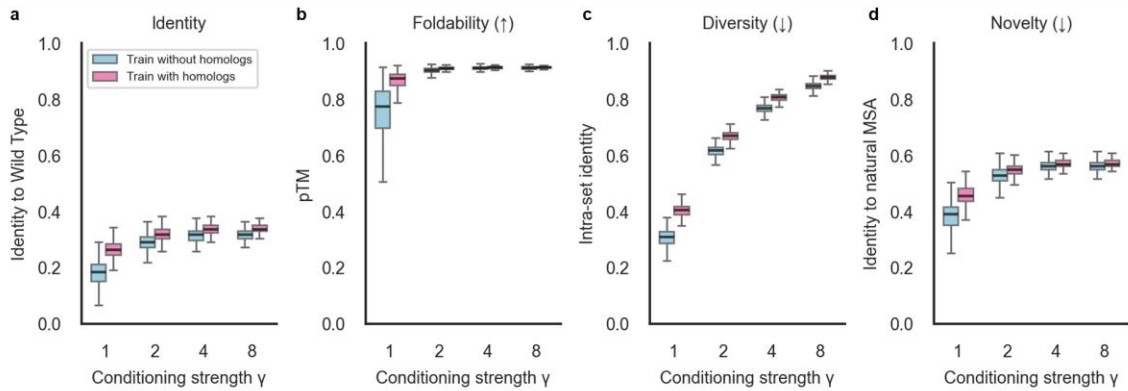

107

108 **Supplementary Fig. S9. Limited impact of training-set redundancy on EvoGUD**

109 **TadA sequence generation.**

110 Comparison of sequence- and structure-level properties of TadA variants generated by  
 111 EvoGUD models trained with (pink) or without (blue) TadA-proximal homologs (>40%  
 112 sequence identity to the TadA wild type). The model trained with/without TadA-proximal  
 113 homologs used exactly the same training settings and networks. Results are shown as a  
 114 function of conditioning strength  $\gamma$ .

115 a, Sequence identity to the TadA wild-type sequence.

116 b, Predicted foldability quantified by ESMFold pTM.

117 c, Intra-set diversity measured as mean pairwise sequence identity among generated  
 118 sequences.

119 d, Novelty measured as the maximum sequence identity of each generated sequence to  
 120 the closest natural homolog in the TadA MSA.

121 Across all metrics and conditioning strengths, the two training regimes exhibit highly  
 122 similar distributions, with only modest increases in identity and novelty for the model  
 123 trained with TadA homologs. These results indicate that the presence of closely related  
 124 sequences in the training set introduces only minor, non-collapsing biases and does not

125 substantially alter EvoGUD's generative behavior. On this basis, we did not explicitly  
126 remove CcdA homologs from the training set or retrain the model for CcdA sequence  
127 generation.

128

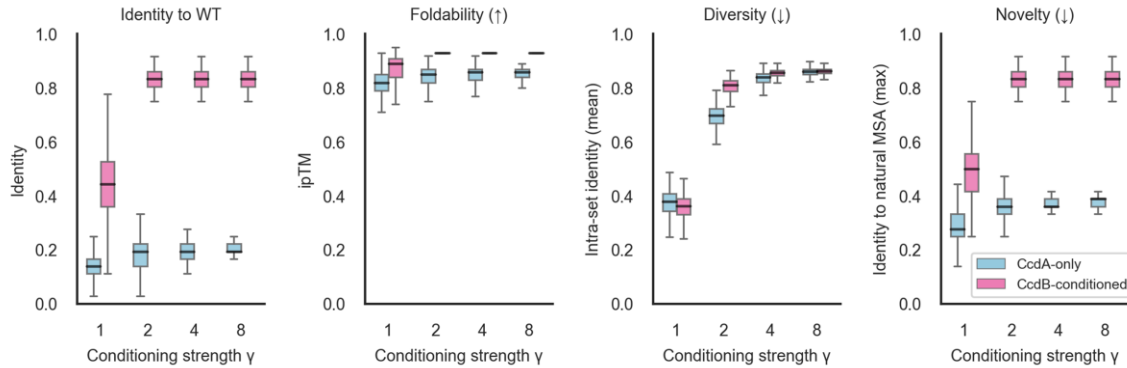

129  
130

**Supplementary Fig. S10. Impact of CcdB fusion conditioning on EvoGUD CcdA**

131 **sequence generation.**

132 Comparison of sequence- and structure-level properties of CcdA variants generated by  
133 EvoGUD under CcdA-only conditioning (blue) or CcdB-G<sub>50</sub>-CcdA-G<sub>50</sub>-CcdB fusion  
134 conditioning (pink), shown as a function of conditioning strength  $\gamma$ .

135 a, Sequence identity to the CcdA wild-type sequence.

136 b, Predicted foldability quantified by AlphaFold3 ipTM for the CcdA-CcdB complex.

137 c, Intra-set diversity measured as mean pairwise sequence identity among generated  
138 CcdA variants.

139 d, Novelty measured as the maximum sequence identity of each generated CcdA variant  
140 to the closest natural homolog in the CcdA MSA.

141 Across conditioning strengths, fusion conditioning with CcdB systematically shifts the  
142 generated sequence distribution toward higher identity to wild-type CcdA and improved  
143 predicted complex foldability, while maintaining controlled diversity and novelty. These  
144 results indicate that conditioning on a cognate binding partner provides informative  
145 interaction-specific constraints that guide EvoGUD toward functionally coherent regions  
146 of sequence space for intrinsically disordered proteins.

147

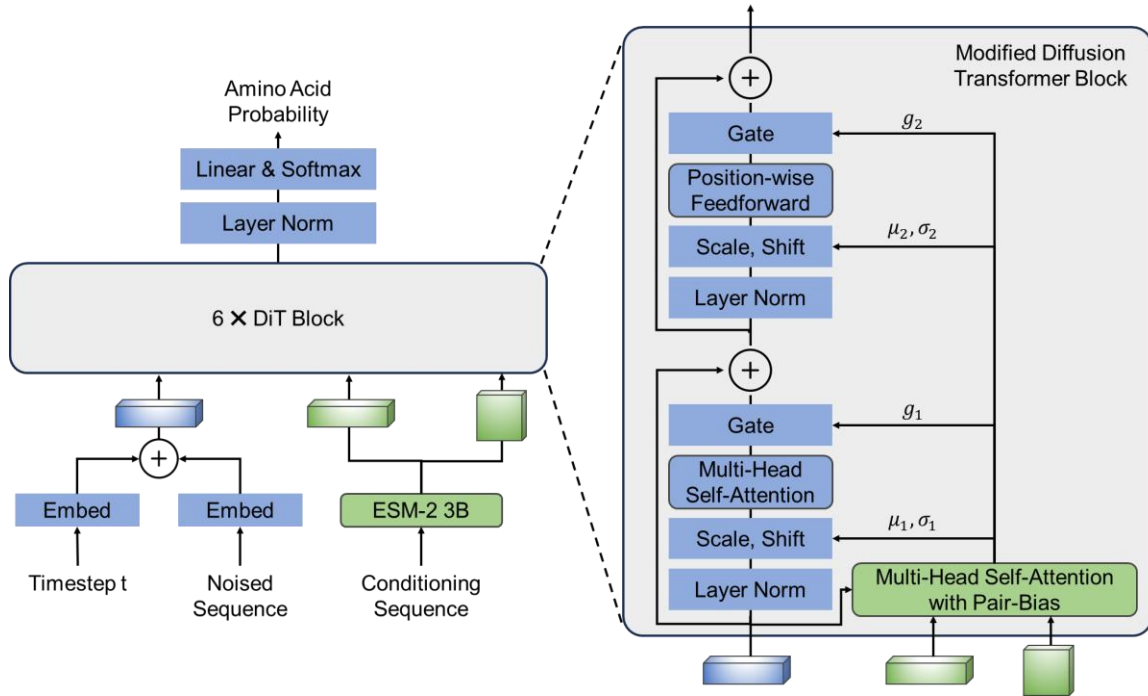

148

149 **Supplementary Fig. S11. Detailed architecture of the Modified Diffusion**

150 **Transformer Block.**

151 Unlike the standard DiT which uses global conditioning, EvoGUD employs a sequence-

152 specific cross-attention module with pair-bias. The ESM-2 residue embeddings serve as

153 the context ( $K$ ,  $V$ ), while the projected attention maps are incorporated as a pair-bias

154 within the multi-head self-attention. This module generates position-wise modulation

155 parameters ( $\mu$ ,  $\sigma$ ,  $g$ ) for the Adaptive Layer Normalization (adaLN-Zero) layers,

156 allowing for spatially-aware control of the denoising process across both the self-

157 attention and position-wise feedforward sub-layers.

158

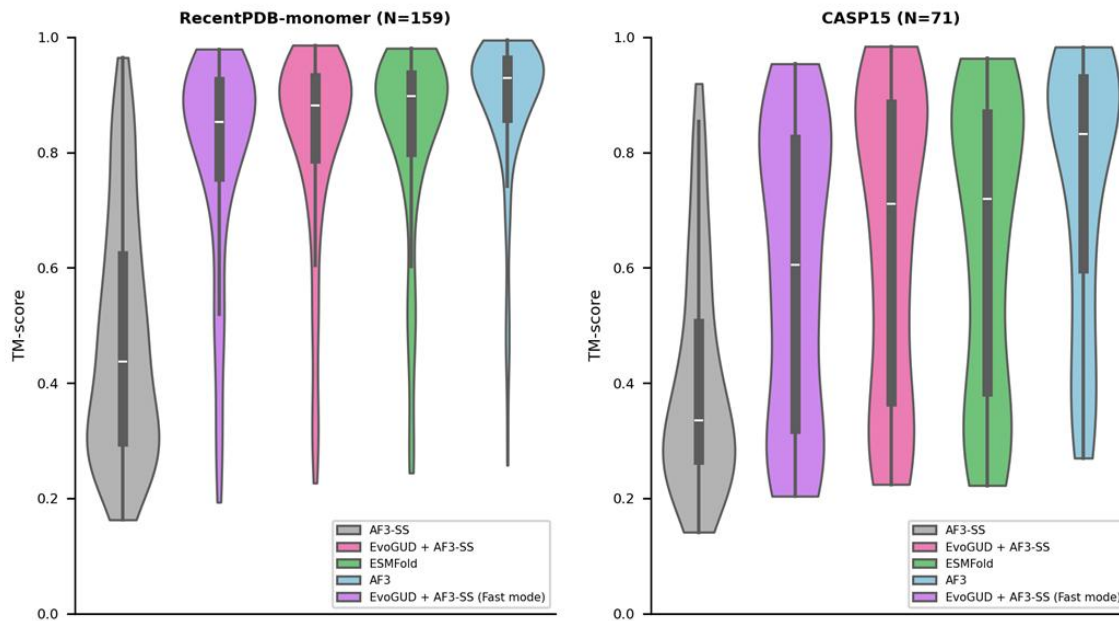

159

160 **Supplementary Fig. S12. Comparison of adaptive GA mode and fixed-trial fast**  
 161 **mode for EvoGUD + AF3-SS on monomer benchmarks.**

162 a, TM-score distributions on the RecentPDB-monomer benchmark (N=159). Predictions  
 163 from AF3-SS (single-sequence AlphaFold3), EvoGUD + AF3-SS with adaptive genetic-  
 164 algorithm selection (default mode), ESMFold, AF3, and EvoGUD + AF3-SS fast mode  
 165 are compared. In the fast mode, a fixed ensemble of 10 preset EvoGUD parameter  
 166 settings is evaluated without iterative optimization, whereas the default mode uses a  
 167 genetic algorithm to adaptively select a target-specific subset of EvoGUD-generated  
 168 sequences for AlphaFold3 inference. The fast mode recovers most of the accuracy gain  
 169 obtained by the adaptive mode, with mean TM-scores of 0.795 for the fast mode and  
 170 0.820 for the adaptive mode, compared with 0.476 for AF3-SS.

171 b, TM-score distributions on the CASP15 monomer benchmark (N=71). The same  
 172 comparison is shown on an independent community benchmark. The fast mode again

173 captures most of the performance gain of EvoGUD-assisted AlphaFold3 while requiring  
174 substantially less computation, with mean TM-scores of 0.593 for the fast mode and  
175 0.650 for the adaptive mode, compared with 0.403 for AF3-SS.

176 Together, these results show that the fixed-trial fast mode provides a computationally  
177 efficient approximation to the default adaptive EvoGUD + AF3-SS pipeline, while the  
178 genetic-algorithm mode yields the strongest overall monomer prediction performance.

179

180 **Supplementary Table S1. Amino acid sequences of wild type TadA and EvoGUD-**  
 181 **generated variants.**

| Name                                   | Sequence                                                                                                                                                           |
|----------------------------------------|--------------------------------------------------------------------------------------------------------------------------------------------------------------------|
| <i>Staphylococcus aureus</i> TadA (WT) | MTNDIYFMTLAIIEEAKKAAQLGEVPIGAIITKDDEVIARAHNLRETLQOPTAHAEHIAIER<br>AAKVLGWSWRLLEGCTLYVTLEPCVMCAGTIVMSRIPRVVYGADDPKGGCSGLMNLQ<br>QSNFNHRAIVDKGVLKEACSTLLTFFKNLNAN    |
| egTadA-1                               | MKDDEEFMEQALKMAEIAIYEKGEIPVGSVVVDNGKIVGSGHNQREKTKDATAHAHEIM<br>AIKKASQKINNWRSLDCVLYVTLEPCAMCSGAMLNARIAKVVWVGAPDPKAGAAGTMA<br>NVFLDPYLNHQVEIKGGLMADECAAMLNSFFREQRKK |
| egTadA-2                               | MKDHEEYMQQALALAREAYALGDVPVAVVVRNGKIVGSGHNQRETTKDAMAHAE<br>MMAITAASQKLGWRLDLCSTIYVTLEPCPMAGAMLQARIAKVFVGFAPDPRAGAAGTI<br>LNVFSSPQLNHHVEITGGVLADECADLLKAYFKARRKK     |
| egTadA-3                               | MKDDEEYMKQAIALAQQALARGDVPVAVVVRNGKILGSGYNQKVKTKDATSHAEM<br>MAIQQASQALNNWRINDAVLYVTLEPCAMCAGAIQARIARVVFVGFAPDPRAGAAGTL<br>ADMFDPRNLNHHVEVLAGVMRDECSMLNEFFRERRKK     |
| egTadA-4                               | MKDDDKYMKEALKLAQKAYAKGETPVGAVVVRNGKILASGYNQKQSTLDATEHAHEI<br>MAIREASQKINNWRSLNDCVLYVTLEPCAMCAGALVQARIAKLIFGAYDPKAGAAGTVF<br>NPKDPHLNHKIEITGGVMKDECADLLQEFFESKRKK   |
| egTadA-5                               | MSDDEFFMKKALKLAQKASKMGEVPVAVVVRNGKILGSGYNQRELTKDATAHAEM<br>LAIQKAGEKLGWRLNDCSTIYVTLEPCPMAGAMIQARVAVVVFVGFAPDPKAGAAGTM<br>ASIFNEPYLNHQVEIIGGIMEDECAELSSFFRQRRKK     |
| egTadA-6                               | MKDDEFMRMALDQARRAFARGEVPIGAVVVRDGRILGAGYNQTERS KDPLAHAEIM<br>AIRQASEALKNWRLTDCVMYVTLEPCAMCAGAMLQARIAKLVFGAPDPRAGAAGSIFD<br>IFNDPSLNHKVEVKGIGGAQECREILKDYFRERRKK    |
| egTadA-7                               | MADDEAFMRQALALARTALAKGDVPVAVVVRGGRIVGAGYNQRQSTKDALAHAEIM<br>LAIREAGRALGNWRSLDCVLYVTLEPCPMCAAAMLQARVARVVFVGFAPDPKAGAAGSF<br>FDIFDDPGLNHRVEITSGLLADECAALLRAFFRERRHK  |
| egTadA-8                               | MKADEAWMRRALDLARRAAAQGEVPVAVVVRDGRIVGAGHNQKEASKDALDHAE<br>MLAIRKASAALKNWRLTDAVIYVTLEPCAMCAGAMAQARVARVVFVGFAPDPRAGAAG<br>TMANVFEDPRLNHHIEVTGGIRADECAALLSSFFRKRKR    |
| egTadA-F1 (Failed)                     | MKDDERYMRRALDRARRAEAAQGEVPVAVLVRGGKILGSGHNQKVQSKDALGHAEM<br>MAITAAAEIAGTWRLPDCVLYVTLEPCPMAGAMIHARVARLVFGAADPRAGAAGSM<br>LDVFGDPRLNHRVAVVAGVMADECAALLKEFFREMRAK     |
| egTadA-F2 (Failed)                     | MKDDEFYMRKALELARRALAAKEVPVAVVVYNGKILGSGYNQKESTKDALAHAEIQ<br>AIREASDALKNWRLDLCVMYVTLEPCAMCAGAIMQARIATVVFVGFAYDPKAGAAGTML<br>DIFEDPHLNHHSEIISGVLAEECKDLMKSYFRERRKK   |

182

183

184 **Supplementary Table S2. egTadA variants activity validation data for plate display.**

| Variant      | TMP-resistant colonies (300 $\mu$ L spread) |       |       |                  | Total viable cells |                    | Activity              |
|--------------|---------------------------------------------|-------|-------|------------------|--------------------|--------------------|-----------------------|
|              | Rep 1                                       | Rep 2 | Rep 3 | Mean $\pm$ STD   | 10 mL              | 300 $\mu$ L**      |                       |
| Neg. Control | 0*                                          | 0     | 0     | 0.00 $\pm$ 0.00  | $2.00 \times 10^9$ | $6.00 \times 10^7$ | 0                     |
| WT           | 9                                           | 13*   | 8     | 10.00 $\pm$ 2.65 | $1.50 \times 10^9$ | $4.50 \times 10^7$ | $4.86 \times 10^{-8}$ |
| egTadA-1     | 20*                                         | 20    | 17    | 19.00 $\pm$ 1.73 | $1.50 \times 10^9$ | $4.50 \times 10^7$ | $9.24 \times 10^{-8}$ |
| egTadA-2     | 12                                          | 15    | 17*   | 14.67 $\pm$ 2.52 | $2.00 \times 10^9$ | $6.00 \times 10^7$ | $5.35 \times 10^{-8}$ |

185 Notes:

186 \* denoted the plates displayed in Fig 4.c.

187 \*\* Total viable cell counts were extrapolated to the 10 mL culture volume from serial  
 188 dilution spot assays on non-selective plates.

189

190 **Supplementary Table S3. egTadA variants activity validation data.**

| Variant  | TMP-resistant colonies (300 $\mu$ L spread) |       |       |                  | Total viable cells            |                               | Activity                       |
|----------|---------------------------------------------|-------|-------|------------------|-------------------------------|-------------------------------|--------------------------------|
|          | Rep 1                                       | Rep 2 | Rep 3 | Mean $\pm$ STD   | 10 mL                         | 300 $\mu$ L*                  |                                |
| egTadA-1 | 9                                           | 9     | 12    | 10.00 $\pm$ 1.73 | 6.00 $\times$ 10 <sup>8</sup> | 1.80 $\times$ 10 <sup>7</sup> | 1.22 $\times$ 10 <sup>-7</sup> |
| egTadA-2 | 5                                           | 3     | 2     | 3.33 $\pm$ 1.53  | 3.00 $\times$ 10 <sup>8</sup> | 9.00 $\times$ 10 <sup>6</sup> | 8.10 $\times$ 10 <sup>-8</sup> |
| egTadA-3 | 6                                           | 15    | 2     | 7.67 $\pm$ 6.66  | 8.00 $\times$ 10 <sup>8</sup> | 2.40 $\times$ 10 <sup>7</sup> | 6.99 $\times$ 10 <sup>-8</sup> |
| egTadA-4 | 9                                           | 6     | 7     | 7.33 $\pm$ 1.53  | 8.50 $\times$ 10 <sup>8</sup> | 2.55 $\times$ 10 <sup>7</sup> | 6.29 $\times$ 10 <sup>-8</sup> |
| egTadA-5 | 2                                           | 4     | 6     | 4.00 $\pm$ 2.00  | 5.50 $\times$ 10 <sup>8</sup> | 1.65 $\times$ 10 <sup>7</sup> | 5.30 $\times$ 10 <sup>-8</sup> |
| egTadA-6 | 5                                           | 5     | 3     | 4.33 $\pm$ 1.15  | 7.00 $\times$ 10 <sup>8</sup> | 2.10 $\times$ 10 <sup>7</sup> | 4.52 $\times$ 10 <sup>-8</sup> |
| egTadA-7 | 2                                           | 2     | 3     | 2.33 $\pm$ 0.58  | 6.50 $\times$ 10 <sup>8</sup> | 1.95 $\times$ 10 <sup>7</sup> | 2.62 $\times$ 10 <sup>-8</sup> |
| egTadA-8 | 3                                           | 3     | 0     | 2.00 $\pm$ 1.73  | 9.00 $\times$ 10 <sup>8</sup> | 2.70 $\times$ 10 <sup>7</sup> | 1.62 $\times$ 10 <sup>-8</sup> |

191 Notes:

192 \* Total viable cell counts were extrapolated to the 10 mL culture volume from serial  
 193 dilution spot assays on non-selective plates.

194

195

196 **Supplementary Table S4. Cloning and sequence verification of selected CcdA**  
 197 **variants.**

| Name                     | Protein Sequence                              | DNA Sequence                                                                                                                 |
|--------------------------|-----------------------------------------------|------------------------------------------------------------------------------------------------------------------------------|
| <i>E. coli</i> CcdA (WT) | MRRLRAERWKAEN<br>QEGMAEVARFIEMN<br>GSFADENRDW | ATGCGTCGTCTGCGCGCAGAACGTTGGAAAGCAGAAAAATCA<br>GGAAGGCATGGCAGAAAGTGGCCCGTTTTATTGAAATGAATG<br>GCAGCTTTGCCGATGAAAATCGTGATTGGTAA |
| egCcdA-1                 | MNRIKAEKWKADN<br>QEGMAEIAKFVEEN<br>GSFAEENRDW | ATGAACCGTATTAAAGCGGAAAAATGGAAAGCGGATAACCA<br>GGAAGGCATGGCGGAAATTGCGAAATTTGTGGAAGAAAACG<br>GCAGCTTTGCGGAAGAAAACCGCGATTGGTAA   |
| egCcdA-14                | MKKMKADQWREEN<br>EEGMAEVARFIDEN<br>GSLAEENRDW | ATGAAAAAATGAAAGCGGATCAGTGGCGCGAAGAAAACG<br>AAGAAGGCATGGCGGAAAGTGGCGCGTTTTATTGATGAAAAAC<br>GGCAGCCTGGCGGAAGAAAACCGCGATTGGTAA  |
| egCcdA-78                | MKKIKAEKWRAEN<br>KEGMAEISKYVEEN<br>GSFAEENRDW | ATGAAAAAATTAAGCGGAAAAATGGCGCGCGGAAAAACA<br>AAGAAGGCATGGCGGAAATTAGCAAATATGTGGAAGAAAA<br>CGGCAGCTTTGCGGAAGAAAACCGCGATTGGTAA    |
| egCcdA-391               | MKKLKAEKWREDN<br>HEGMAEISKYIEMN<br>GSFADENKEW | ATGAAAAAACTGAAAGCGGAAAAATGGCGCGAAGATAACC<br>ATGAAGGCATGGCGGAAATTAGCAAATATATTGAAATGAAC<br>GGCAGCTTTGCGGATGAAAACAAAGAATGGTAA   |
| egCcdA-509               | MKKLKAEKWKAEN<br>QEGMSEIARYVEVN<br>GSFAEENRDW | ATGAAAAAACTGAAAGCGGAAAAATGGAAAGCGGAAAAACC<br>AGGAAGGCATGAGCGAAATTGCGCGCTATGTGGAAGTGAAC<br>GGCAGCTTTGCGGAAGAAAACCGCGATTGGTAA  |
| egCcdA-630               | MKKLKAEKWRAEN<br>QEGMAEVARYVELN<br>GSFAEDNRDW | ATGAAAAAACTGAAAGCGGAAAAATGGCGCGCGGAAAAACC<br>AGGAAGGCATGGCGGAAAGTGGCGCGTTATGTGGAAGTGAAC<br>GGCAGCTTTGCGGAAGATAACCGTATTGGTAA  |
| egCcdA-660               | MKKLKAEQWRAEN<br>AEGMAEISKIVEVNG<br>SFADENRDW | ATGAAAAAACTGAAAGCGGAACAGTGGCGCGCGGAAAAACG<br>CGGAAGGCATGGCGGAAATTAGCAAATTTGTGGAAGTGAAC<br>GGCAGCTTTGCGGATGAAAACCGCGATTGGTAA  |
| egCcdA-675               | MKRLKAEKWKAEN<br>EEGMAEIAKFIDENG<br>SFGDENKEW | ATGAAACGCCTGAAAGCGGAAAAATGGAAAGCGGAAAAACG<br>AAGAAGGCATGGCGGAAATTGCGAAATTTATTGATGAAAAAC<br>GGCAGCTTTGGCGATGAAAACAAAGAATGGTAA |
| egCcdA-933               | MKKLKAEKWREDN<br>EEGMEEIAKYVEMN<br>GSFAEDNRDW | ATGAAAAAACTGAAAGCGGAAAAATGGCGCGAAGATAACG<br>AAGAAGGCATGGAAGAAATTGCGAAATATGTGGAATGAAC<br>GGCAGCTTTGCGGAAGATAACCGCGATTGGTAA    |

198

199 **Supplementary Table S5. Identity-to-reference versus predicted divergence time**  
 200 **from TimeTree-calibrated fits.**

| Family | Reference                               | Identity to reference | Predicted divergence (Ma) |
|--------|-----------------------------------------|-----------------------|---------------------------|
| TadA   | <i>E. coli</i> TadA<br>(UniProt P68398) | 0.8                   | 1.4049                    |
|        |                                         | 0.7                   | 231.7360                  |
|        |                                         | 0.6                   | 561.3701                  |
|        |                                         | 0.5                   | 1148.1288                 |
| CcdA   | <i>E. coli</i> CcdA<br>(UniProt P62552) | 0.9                   | 4.6449                    |
|        |                                         | 0.8                   | 20.3885                   |
|        |                                         | 0.7                   | 40.2859                   |
|        |                                         | 0.6                   | 67.3466                   |
|        |                                         | 0.5                   | 109.8419                  |
|        |                                         | 0.4                   | 215.5726                  |

201 Notes:  
 202 Values are derived from TimeTree-calibrated timetrees and MSA-based identities using a  
 203 saturating decay fit. They are intended as approximate, order-of-magnitude mappings  
 204 rather than strict molecular-clock estimates. This Table is adapted from Chen et al.<sup>1</sup>  
 205

206 **Supplementary Table S6. RecentPDB-monomer test set.**

---

8UX2, 8G32, 8GM3, 8V6T, 9AZZ, 8W7P, 8R2C, 8G0N, 8VC8, 8CKN, 8OU1, 9BKW, 8QPJ, 8IRQ, 8TFO, 8CPK, 8FZ9, 8S5B, 8DQD, 8I11, 8RXA, 8ROM, 8G1L, 9FGP, 8T9T, 8RCW, 8YXK, 8JB3, 8SUC, 8SX0, 8J8Y, 8YQ4, 8Q1V, 8U47, 8IUD, 8JJN, 8JUP, 8POR, 8GKD, 8P8E, 8XJG, 8PAJ, 8P0C, 8TJG, 8CBA, 9B8D, 8WIK, 8TI5, 8QD1, 8X38, 8SSK, 8TW1, 8YTS, 8EZ6, 8Y9P, 8HEL, 8VPO, 8PAB, 8YE0, 8XIF, 8RE3, 8V33, 8S9L, 8RA0, 8ZQF, 8QLE, 8CIH, 8PW2, 8UJL, 8J2N, 8SV7, 8HW6, 8RHE, 8FZ8, 8CPQ, 8QB1, 7Z65, 8OVQ, 8FJM, 8QOH, 8T2J, 8YA6, 8OLD, 8SCA, 8QQ1, 8GDL, 8PAQ, 7GQS, 8BTM, 8IYM, 8YCM, 8TLS, 8FMG, 8S0U, 8IVH, 8TN1, 8IW2, 8VR3, 8VVA, 8Q90, 8J2W, 7YPD, 8VKT, 8X6V, 8Q28, 8PB3, 8P4W, 8V14, 8UOO, 8SBH, 8CMP, 8J5E, 8JU9, 8IXW, 8JDH, 8YPJ, 8WBL, 8YLA, 8P2O, 8JU3, 8SM8, 8CLO, 8OI4, 8JU7, 8JA1, 8V6S, 8Z9U, 8YLZ, 8TCD, 8VR2, 8WU6, 8VDW, 8UFO, 8P37, 8CKG, 8IYP, 8IMD, 8G48, 8PQP, 8IHA, 8HJF, 8IS2, 8AND, 8S9W, 8YE5, 8Q1W, 8ACX, 8VR6, 8OV8, 8JYV, 8WCT, 8JQF, 8QKY, 8IL8, 8SM6, 9ARD, 8W1D, 8ONM, 8IOO

---

207

208 **Supplementary Table S7. RecentPDB-multimer test set.**

---

7B0C, 7BCA, 7BJQ, 7EDS, 7EOF, 7F3J, 7F9H, 7M4L, 7MWH, 7MZ0, 7MZ1, 7MZ2, 7N5U, 7N5V, 7N5W, 7NQF, 7OGS, 7OOT, 7OUE, 7OWF, 7OY7, 7P0W, 7P3F, 7P8L, 7P9J, 7P9Z, 7PSX, 7PZA, 7PZB, 7Q3O, 7Q4N, 7Q94, 7QAZ, 7R6R, 7R6T, 7R8G, 7R8H, 7R8I, 7RCC, 7RCD, 7RCE, 7RCF, 7RCG, 7RGU, 7RSR, 7RSS, 7S03, 7S68, 7S9J, 7S9K, 7S9L, 7S9M, 7S9N, 7S9O, 7S9P, 7S9Q, 7SOP, 7SOS, 7SOT, 7SOU, 7SOV, 7SOW, 7SUM, 7SUV, 7SVB, 7SX5, 7SXE, 7T18, 7T19, 7T1A, 7T1B, 7T8K, 7TDW, 7TDX, 7TEA, 7TEC, 7TO1, 7TO2, 7TQW, 7TUV, 7TXC, 7TZ1, 7TZV, 7U76, 7U79, 7U7A, 7U7B, 7U7C, 7U7F, 7U7G, 7U7I, 7U7J, 7U7K, 7U7L, 7UBL, 7UBU, 7UPZ, 7UU4, 7UXD, 7V2Z, 7VE5, 7VG8, 7VKI, 7VKL, 7VN2, 7VO9, 7VOU, 7VOV, 7VOX, 7VP1, 7VP2, 7VP3, 7VP4, 7VP5, 7VP7, 7VSJ, 7VTI, 7WM3, 7WQ5, 7X5E, 7X5F, 7X5G, 7X5L, 7X5M, 7XHV, 7XI3, 7XQ5, 7XRC, 7XS4, 7YHO, 7YZE, 7YZF, 7YZG, 7Z0U, 7Z5A, 7ZHH, 7ZVN, 7ZVX, 8A1C, 8A4I, 8B0R, 8CSH, 8CTZ, 8CU0, 8CZQ, 8DVP, 8DVR, 8DVS, 8DVU, 8DVY, 8DW0, 8DW1, 8DW4, 8DW8, 8DWM, 8DZK, 8E2P, 8E2Q, 8EDJ, 8EF9, 8EFC, 8EFK, 8GMS, 8GMT, 8GMU

---

209

210

211 **Supplementary Table S8. The sequence of pUC57-Kan-ccdA/B, pUC57-Kan-**  
 212 **2BspQI-ccdB and primers used in this study.**

|                          |                                                                                                                                                                                                                                                                                                                                                                                                                                                                                                                                                                                                                                                                                                                                                                                                                                                                                                                                                                                                                                                                                                                                                                                                                                                                                                                                                                                                                                                                                                                                                                                                                                                                                                                                                                                                                                                                                                                                                                                                                                                                                                                                                                                                                                                                                                                                                                                                                                                                                                                                                                                                                                                                                                                                                                                                                                                                                                                                                                                                                                                                              |
|--------------------------|------------------------------------------------------------------------------------------------------------------------------------------------------------------------------------------------------------------------------------------------------------------------------------------------------------------------------------------------------------------------------------------------------------------------------------------------------------------------------------------------------------------------------------------------------------------------------------------------------------------------------------------------------------------------------------------------------------------------------------------------------------------------------------------------------------------------------------------------------------------------------------------------------------------------------------------------------------------------------------------------------------------------------------------------------------------------------------------------------------------------------------------------------------------------------------------------------------------------------------------------------------------------------------------------------------------------------------------------------------------------------------------------------------------------------------------------------------------------------------------------------------------------------------------------------------------------------------------------------------------------------------------------------------------------------------------------------------------------------------------------------------------------------------------------------------------------------------------------------------------------------------------------------------------------------------------------------------------------------------------------------------------------------------------------------------------------------------------------------------------------------------------------------------------------------------------------------------------------------------------------------------------------------------------------------------------------------------------------------------------------------------------------------------------------------------------------------------------------------------------------------------------------------------------------------------------------------------------------------------------------------------------------------------------------------------------------------------------------------------------------------------------------------------------------------------------------------------------------------------------------------------------------------------------------------------------------------------------------------------------------------------------------------------------------------------------------------|
| pUC57-Kan-ccdA/B *       | <p>TGCAGCTCTGGCCCGTGTCTCAAAATCTCTGATGTTACATTGCACAAGATAAA<br/>     AATATATCATCATGAACAATAAACTGTCTGCTTACATAAACAGTAATACAAG<br/>     GGGTGTATGAGCCATATTCAACGGGAAACGTCGAGGCCGCGATTAAATTC<br/>     AACATGGATGCTGATTTATATGGGTATAAATGGGCTCGCGATAATGTCCGGCA<br/>     ATCAGGTGCGACAATCTATCGCTTGTATGGGAAGCCCGATGCGCCAGAGTTGT<br/>     TTCTGAAACATGGCAAAGGTAGCGTTGCCAATGATGTTACAGATGAGATGGT<br/>     CAGACTAAACTGGCTGACGGAATTTATGCCTCTCCGACCATCAAGCATTTTA<br/>     TCCGTACTCCTGATGATGCATGGTTACTACCACTGCGATCCCCGGAAAAACA<br/>     GCATTCCAGGTATTAGAAGAATATCCTGATTCAGGTGAAAATATTGTTGATGC<br/>     GCTGGCAGTGTTCCTGCGCCGGTTGCATTTCGATTCTGTTTGAATTGTCCTTT<br/>     TAACAGCGATCGCGTATTTTCGTCTCGCTCAGGCGCAATCACGAATGAATAACG<br/>     GTTTGGTTGATGCGAGTGATTTTGTATGACGAGCGTAATGGCTGGCCCTGTTGAA<br/>     CAAGTCTGGAAAGAAATGCATAAACTTTTGCATTCTCACCGGATTCAGTCGT<br/>     CACTCATGGTGATTTCTCATTGATAACCTTATTTTTGACGAGGGGAAATTA<br/>     TAGGTTGATTGATGTTGGACGAGTCGGAATCGCAGACCGATACCGAGGATTT<br/>     GCCATCCTATGGAAGTGCCTCGGTGAGTTTTCTCCTTATTACAGAAACGGCT<br/>     TTTTCAAAAATATGGTATTGATAATCCTGATATGAATAAATGCAGTTTCATT<br/>     GATGCTCGATGAGTTTTTCTAATCAGAATTGGTTAATTGGTTGTAACATTATTC<br/>     AGATTGGGCTTGATTTAAACTTCATTTTTAATTTAAAGGATCTAGGTGAAG<br/>     ATCCTTTTTGATAATCTCATGACCAAAATCCCTAACGTGAGTTTTCGTTCCAC<br/>     TGACGTCAGACCCCGTAGAAAAGATCAAAGGATCTTCTTGAGATCCTTTTTT<br/>     TCTGCGCGTAATCTGCTGCTTGCAAACAAAAAAACCACCGCTACCAGCGGTG<br/>     GTTTGTTGCCGGATCAAGAGCTACCAACTCTTTTTCCGAAGGTAACGGCTT<br/>     CAGCAGAGCGCAGATACCAATACTGTTCTTCTAGTGTAGCCGTAGTTAGGCC<br/>     ACCACTTCAAGAAGTCTGTAGCACCGCCTACATACCTCGCTCTGTAATCCTG<br/>     TTACCAGTGGCTGCTGCCAGTGGCGATAAGTCCGTGCTTACCGGGTTGGACTC<br/>     AAGACGATAGTTACCGGATAAAGGCGCAGCGGTCCGGCTGAACGGGGGGTTCC<br/>     TGCACACAGCCCAGCTTGGAGCGAACGACCTACACCGAACTGAGATACCTAC<br/>     AGCGTGAGCTATGAGAAAGCGCCACGCTTCCCGAAGGGAGAAAGCGGACA<br/>     GGTATCCGGTAAGCGGCAGGGTCGGAACAGGAGAGCGCACGAGGGAGCTTCC<br/>     AGGGGGAAACGCCTGGTATCTTTATAGTCTGTCGGGTTTCGCCACCTCTGAC<br/>     TTGAGCGTCGATTTTTGTGATGCTCGTCAGGGGGGCGGAGCCTATGAAAAAC<br/>     GCCAGCAACGCGCCTTTTTACGGTTCTGGCCTTTTGCTGGCCTTTTGCTCAC<br/>     ATGTttgacagctagctcagcttaggataatgtagctactagagaaaggagaaatactagATGCGTCTGCT<br/>     GCGCGCAGAACGTTGGAAAGCAGAAAAATCAGGAAGGCATGGCAGAAGTGGC<br/>     CCGTTTTATTGAAATGAATGGCAGCTTTGCCGATGAAAATCGTGTATGGTAA<br/>     GCTTgcacaggtcGTGACTTAAATGCCCAAAACATCAGGTTAATGGCATTCTTA<br/>     ATATCATTTTTACGATGACTCAGATCTGCCACTTCTTACCAATAACACTAAC<br/>     CGGCACACTTGCCATATCGGTGGTCATCATACGCCAACTTTCATCGCCAATAT<br/>     GCACAACCGGATACAGTTCACGACTACTTTATCACTCAGCAGGCGGGCGCTG<br/>     GCCAGCGGAATAACCATACGGCGACCCGGGGTATCAATAATATCGCTCTGCA<br/>     CATCCACAAACAGACGATAACGGCTTTCACGCTTATAGGTGTAACCTTAAAC<br/>     TGCATactctcttttcaatattattgaagcattatcagggttattgtctcatgagcggatacatattgaatgattagaaaaat<br/>     aaacaaaCATATGGTGCCTCTCAGTACAATCTGCTCTGATGCCGATAGTTAAGC<br/>     CAGCCCCGACACCCGCCAACACCCGCTGACGCGCCCTGACGGGCTTGTCTGCT<br/>     CCCGGCATCCGCTTACAGACAAGCTGTGACCGTCTCCGGGAGCTGCATGTGTC<br/>     AGAGGTTTTACCGTCATCACCGAAACGCGCGA</p> |
| pUC57-Kan-2BspQI-ccdB ** | <p>TGCAGCTCTGGCCCGTGTCTCAAAATCTCTGATGTTACATTGCACAAGATAAA<br/>     AATATATCATCATGAACAATAAACTGTCTGCTTACATAAACAGTAATACAAG<br/>     GGGTGTATGAGCCATATTCAACGGGAAACGTCGAGGCCGCGATTAAATTC<br/>     AACATGGATGCTGATTTATATGGGTATAAATGGGCTCGCGATAATGTCCGGCA<br/>     ATCAGGTGCGACAATCTATCGCTTGTATGGGAAGCCCGATGCGCCAGAGTTGT<br/>     TTCTGAAACATGGCAAAGGTAGCGTTGCCAATGATGTTACAGATGAGATGGT<br/>     CAGACTAAACTGGCTGACGGAATTTATGCCTCTTCCGACCATCAAGCATTTTA<br/>     TCCGTACTCCTGATGATGCATGGTTACTACCACTGCGATCCCCGGAAAAACA</p>                                                                                                                                                                                                                                                                                                                                                                                                                                                                                                                                                                                                                                                                                                                                                                                                                                                                                                                                                                                                                                                                                                                                                                                                                                                                                                                                                                                                                                                                                                                                                                                                                                                                                                                                                                                                                                                                                                                                                                                                                                                                                                                                                                                                                                                                                                                                                                                                                                                                                                                                                              |

GCATTCCAGGTATTAGAAGAATATCCTGATTCAGGTGAAAATATTGTTGATGC  
GCTGGCAGTGTTCCTGCGCCGGTTGCATTTCGATTCTGTTTGAATTGTCCTTT  
TAACAGCGATCGCGTATTTTCGTCCTCAGGCGCAATCACGAATGAATAACG  
GTTTGGTTGATGCGAGTGATTTTGTGACGAGCGTAATGGCTGGCCCTGTTGAA  
CAAGTCTGGAAGAAATGCATAAACTTTTGCATTCTCACCGGATTCAGTCGT  
CACTCATGGTGATTTCTCACTTGATAACCTTATTTTACGAGGGGAAATTA  
TAGGTTGATTGATGTTGGACGAGTCGGAATCGCAGACCGATACCAGGATCT  
GCCATCCTATGGAAGTGCCTCGGTGAGTTTTCTCCTTCATTACAGAAACGGCT  
TTTTCAAAAATATGGTATTGATAATCCTGATATGAATAAATTGCAGTTTCATT  
GATGCTCGATGAGTTTTTCTAATCAGAATTGGTTAATTGGTTGTAACATTATTC  
AGATTGGGCTTGATTTAAACTTCATTTTTAATTTAAAGGATCTAGGTGAAG  
ATCCTTTTTGATAATCTCATGACCAAAATCCCTAACGTGAGTTTTCTGTTCCAC  
TGAGCGTCAGACCCCGTAGAAAAGATCAAAGGATCTTCTTGAGATCCTTTTT  
TCTGCGCGTAATCTGCTGCTTGCAAACAAAAAACCCGCTACCAGCGGT  
GTTTGTGTTGCCGGATCAAGAGCTACCAACTCTTTTTCCGAAGGTAACGGCT  
CAGCAGAGCGCAGATACCAATACTGTTCTTCTAGTGTAGCCGTAGTTAGGCC  
ACCACTTCAAGAAGTCTGTAGCACCGCCTACATACCTCGCTCTGTAATCCTG  
TTACCAGTGGCTGCTGCCAGTGGCGATAAGTCGTGCTTACCGGGTTGGACTC  
AAGACGATAGTTACCGGATAAAGGCGCAGCGGTGCGGGCTGAACGGGGGGTTCC  
TGCACACAGCCCAGCTTGGAGCGAACGACCTACACCGAACTGAGATACCTAC  
AGCGTGAGCTATGAGAAAGCGCCACGCTTCCCGAAGGGAGAAAGGCGGACA  
GGTATCCGGTAAGCGGCAGGGTCGGAACAGGAGAGCGCACGAGGGAGCTTCC  
AGGGGGAAACGCCTGGTATCTTTATAGTCCTGTCGGGTTTCGCCACCTGAC  
TTGAGCGTCGATTTTTGTGATGCTCGTCAGGGGGGCGGAGCCTATGGAAAAC  
GCCAGCAACGCGCCTTTTTACGGTTCTGGCCTTTTGCTGGCCTTTTGCTCAC  
ATGTttgacagctagctcagcttaggtataatgctagctactagagaaagaggagaataactagATGAGAAGAGC  
ACGTCCGATTGCTCTTCGtaaAAGCTTgcacaggtcGTCGACTTAAATGCCCAAAA  
CATCAGGTTAATGGCATTCTTAATATCATTTCACGATGACTCAGATCTGCCA  
CTTCTTACCAATAACACTAACCGGCACACTTGCCATATCGGTGGTCATCATA  
CGCCAACCTTTCATCGCCAATATGCACAACCGGATACAGTTCACGACTCACTTT  
ATCACTCAGCAGGCGGGCGCTGGCCAGCGGAATAACCATACGGCGACCCGGG  
GTATCAATAATATCGCTCTGCACATCCACAAACAGACGATAACGGCTTTCAG  
CTTATAGGTGTAAACCTTAAACTGCA Tactctccttttcaatattattgaagcattatcagggfattgtct  
catgagcggatacatattgaaatgatttagaaaaataaacaacCATATGGTGCCTCTCAGTACAATCTG  
CTCTGATGCCGCATAGTTAAGCCAGCCCCGACACCCGCCAACACCCGCTGACG  
CGCCCTGACGGGCTTGTCTGCTCCCGGCATCCGCTTACAGACAAGTGTGACC  
GTCTCCGGGAGCTGCATGTGTCAGAGGTTTTACCGTCATCACCGAAACGCGC  
GA

|                        |                                                                                            |
|------------------------|--------------------------------------------------------------------------------------------|
| P5-ccdA-009-FP         | AATGATACGGCGACCACCGAGATCTACACtctgttggACACTCTTCCCTACACGA<br>CGCTCTCCGATCTCTGGCCTTTTGCTGGCCT |
| P7-SalI-009-RD2-<br>RP | CAAGCAGAAGACGGCATACGAGATcctgaactGTGACTGGAGTTCAGACGTGTGC<br>TCTTCCGATCtTAAGTCGACgacctgtgc   |
| P5-ccdA-010-FP         | AATGATACGGCGACCACCGAGATCTACACctcaccacAACTCTTCCCTACACGA<br>CGCTCTCCGATCTCTGGCCTTTTGCTGGCCT  |
| P7-SalI-010-RD2-<br>RP | CAAGCAGAAGACGGCATACGAGATttcaggtcGTGACTGGAGTTCAGACGTGTGC<br>TCTTCCGATCtTAAGTCGACgacctgtgc   |

- 213 Notes:
- 214 \* For pUC57-Kan-ccdA/B, the J23119 promoter, ccdA<sup>36-72</sup>, ccdB and AmpR promoter
- 215 sequence are highlighted in red, green, blue, and purple, respectively. The plasmid
- 216 backbone is pUC57-Kan.

217 \*\* For pUC57-Kan-2BspQI-ccdB, the J23119 promoter, BspQI site, ccdB and AmpR  
218 promoter sequence are highlighted in red, green, blue, and purple, respectively. The  
219 plasmid backbone is pUC57-Kan.

220

## 221 **Supplementary Methods**

### 222 **Adaptive vMSA selection by genetic algorithm for EvoGUD + AF3-SS**

223 For the default monomer prediction pipeline, we used a genetic algorithm (GA) to  
224 adaptively select a target-specific subset of EvoGUD-generated sequences as the virtual  
225 MSA (vMSA) input to AlphaFold3. For each query, EvoGUD sequences generated under  
226 multiple conditioning strengths ( $\gamma = 1, 2, \text{ and } 4$ ; 1,024 sequences per setting) were pooled  
227 into a candidate library. The GA then iteratively optimized both vMSA composition and  
228 vMSA depth by evaluating candidate subsets with AlphaFold3 single-sequence inference  
229 and ranking them by a confidence-based fitness score ( $\text{pTM} + 0.5 \cdot \text{pLDDT}$ ). Population  
230 updates used elitism, selection, crossover, mutation, and immigrant introduction over 5 to  
231 50 generations, with population size 32. Early stop would be applied if pTM reach 0.9 or  
232 best fitness score did not improve for 5 generations. To improve robustness, initial  
233 populations and newly introduced individuals were biased by the empirical landscape  
234 derived from the benchmark grid search (Supplementary Fig. S5), rather than sampled  
235 uniformly. The best-scoring subset identified during the search was used as the final  
236 EvoGUD + AF3-SS prediction for each monomer target.

237

### 238 **Experimental Validation of TadA Variants**

#### 239 **TadA DNA-editing assay**

240 DNA-editing activity of TadA variants was assessed using a trimethoprim (TMP)  
241 resistance reversion assay in *Escherichia coli*. A modified R67 dihydrofolate reductase  
242 (DHFR) reporter gene containing a premature TAG stop codon was co-expressed with

243 TadA variants. TadA-mediated A→G editing restores the functional TGG codon, thereby  
244 conferring resistance to TMP. Editing activity was defined as the site-specific per-base  
245 per-generation mutation rate,  $\mu_{s.p.b.}$ , which was estimated from the observed frequency  
246 of TMP-resistant colonies using a Luria–Delbrück rare-mutation approximation. TMP-  
247 resistant colonies were further validated by Sanger sequencing to confirm the intended  
248 A→G substitution. Specific details listed below.

249

### 250 **Reagents and bacterial strains**

251 PCR reactions for cloning and cassette generation were performed using 2× Phanta UniFi  
252 Master Mix DNA Polymerase (Vazyme, P516-02). Colony PCR for sequencing  
253 validation employed Premix Taq DNA Polymerase (Takara, R901A). Homologous  
254 recombination cloning was carried out using the CloneExpress II One Step Cloning Kit  
255 (Vazyme, C112-02). Primers were synthesized by GENEWIZ (Suzhou, China). Gene  
256 sequences for R67 and engineered TadA variants were synthesized by GENERAL BIOL  
257 (Anhui, China).

258 Ampicillin sodium (Sangon Biotech, A100339-0025), chloramphenicol, and L-arabinose  
259 were purchased from commercial suppliers. Chemically competent *E. coli* DH5 $\alpha$  and  
260 DH10B cells were purchased from AlpalifeBio (Beijing, China) and Biomed (Beijing,  
261 China), respectively.

262

### 263 **Plasmid construction**

264 pMuta088 was constructed using pDae079 (eMutaT7transition; Addgene #187622) as the  
265 backbone<sup>2</sup>. The vector backbone was amplified via PCR (primers: araBAD-FP and araC-

266 RP), and the resulting product was purified using a gel extraction kit. The purified  
267 fragment was ligated with T4 ligase and T4 polynucleotide kinase, then cloned into *E.*  
268 *coli* DH5 $\alpha$  to generate the pMuta088 vector. The resulting pMuta088 carries the tandem  
269 PmCDA1-T7 RNA polymerase and uracil glycosylase inhibitor (UGI). Plasmids for  
270 expressing TadA variants and T7 RNA polymerase were constructed by replacing the  
271 PmCDA1 gene in the pMuta088 with engineered TadA sequences via homologous  
272 recombination. A negative control plasmid (pT7RNAP- $\Delta$ TadA), expressing only an  
273 Xten-linker-T7RNAP cassette, was constructed using the same strategy.  
274 The TMP-resistance reporter plasmid (pReporter-R67<sup>W23\*\*</sup>) was generated by inserting  
275 the R67 gene into a low-copy-number vector T7 promoter + terminators reporter  
276 (Addgene #156456) replacing the *neoR/kanR* cassette<sup>3</sup>. A premature stop codon  
277 (TGG $\rightarrow$ TAG; Trp23 $\rightarrow$ Stop) was introduced by site-directed mutagenesis. TMP  
278 resistance is restored only upon TadA-mediated A $\rightarrow$ G editing at the target site.

279

### 280 **Evaluation of editing frequency**

281 Chemically competent *E. coli* DH10B cells were co-transformed with (i) the reporter  
282 plasmid (AmpR) and (ii) the TadA expression plasmid (CmR). Transformants were  
283 selected on LB agar containing 100  $\mu$ g/mL ampicillin and 25  $\mu$ g/mL chloramphenicol.  
284 Individual colonies were picked and inoculated directly into LB broth containing 100  
285  $\mu$ g/mL ampicillin, 25  $\mu$ g/mL chloramphenicol, and 0.2% (w/v) L-arabinose, and  
286 incubated overnight (16 h) at 37°C to initiate TadA induction and mutation  
287 accumulation. Subsequently, the cultures were subcultured (1:100 dilution) into fresh

288 induction medium (supplemented with the same antibiotics and arabinose) and grown for  
289 4 h to fix mutations under constant agitation (37°C, 220 rpm).

290 At the endpoint, the editing frequency was determined as the ratio  $N_1 / N_0$ . Here,  $N_1$   
291 represents the total TMP-resistant colonies (extrapolated to the total culture volume from  
292 colony counts on 300  $\mu$ L spread plates), and  $N_0$  represents the total viable cells  
293 (extrapolated to the total culture volume from serial dilution spot assays). Plating for  
294  $N_1$  was performed in triplicate.

295

### 296 **Activity calculation**

297 Endpoint editing frequencies were converted to per-base per-generation mutation rates  
298 using the Luria–Delbrück rare-mutation approximation. Under this model, the expected  
299 frequency satisfies:

$$300 \quad \mathbb{E}[f] \approx \mu \ln R_{\text{eff}}$$

301 where  $\mu$  is the mutation rate (per base per generation) and  $R_{\text{eff}}$  represents the effective  
302 population expansion. Although induction was maintained for 16 hours, the calculation  
303 was normalized to the effective population expansion of the final outgrowth step (one  
304 propagation cycle), as mutation fixation is replication-dependent. This 4-hour growth  
305 cycle consisted of a 1:100 reinoculation followed by regrowth to saturation,  
306 corresponding to approximately 6.6 generations ( $G$ ). Assuming binary fission ( $R_{\text{eff}} =$   
307  $2^G$ ), the normalization factor is.  $G \ln 2 \approx 4.57$ .

308 Because TMP resistance restoration requires a single-base reversion, the effective target  
309 size was set to  $S = 1$ , and mutation rates were reported without normalization by the 192-  
310 bp reporter length. The site-specific per-base mutation rate was calculated as:

311 
$$\mu_{\text{s.p.b.}} = \frac{f}{G \ln 2} \approx \frac{f}{4.57}$$

312

### 313 **Verification of R67 reversion**

314 To confirm that TMP resistance resulted from the intended A→G substitution, five  
315 independent TMP-resistant colonies per variant were analyzed by colony PCR and  
316 Sanger sequencing (GENEWIZ, Suzhou, China). R67 sequences were aligned against  
317 wild-type and mutant references to verify the codon 23 reversion and identify any  
318 additional substitutions.

319

### 320 **Experimental Validation of CcdA Variants**

#### 321 **Vector design and construction**

322 The pUC57-Kan-ccdA/B vector was designed to co-express the CcdA<sup>36-72</sup> domain and  
323 CcdB in *E. coli*. The construct places the J23119 promoter driving ccdA<sup>36-72</sup> on the  
324 forward strand and the AmpR promoter driving ccdB on the reverse strand, with a 21-bp  
325 spacer between stop codons for PCR amplification. Both genes were codon-optimized for  
326 *E. coli* and synthesized by General Biosystems. Constructs were cloned into the PciI and  
327 NdeI restriction sites of the pUC57-Kan vector.

328 The pUC57-Kan-2BspQI-ccdB vector used for library construction was generated in  
329 DB3.1 competent cells using the pUC57-Kan-ccdA/Bas template. These two vectors  
330 were verified by Sanger sequencing and the sequences information are provided in  
331 Supplementary Tables S8.

332

333 **Library construction, screening, and deep sequencing**

334 Codon-optimized CcdA<sup>36-72</sup> variants were synthesized as an oligonucleotide pool flanked  
335 by BspQI restriction sites (GenScript, China). First, the oligo pool was amplified using  
336 PrimerSTAR HS DNA polymerase (Takara). The resulting product was then digested  
337 with BspQI and ligated into the linearized pUC57-Kan-2BspQI-ccdB vector using T4  
338 DNA ligase (Takara). After purification, the ligation products were finally electroporated  
339 into *E. coli* DB3.1 competent cells using a Bio-Rad Micropulser. Transformants were  
340 recovered in LB medium at 37 °C for 1 h. Library size was estimated by serial dilution  
341 and plating on kanamycin-containing LB agar. The bulk culture was supplemented with  
342 kanamycin (50 µg/mL) and incubated for 10 h, followed by amplification and plasmid  
343 extraction. The unselected library was stored in LB medium containing 15% glycerol at  
344 –80 °C.

345 Plasmids extracted from DB3.1 cells constituted the unselected library and were  
346 subsequently electroporated into ccdB-sensitive DH5α cells for functional selection.

347 Plasmids recovered from DH5α transformants constituted the selected library. The  
348 CcdA<sup>36-72</sup> region was PCR-amplified from both libraries using indexed primers  
349 (Supplementary Table S7), gel-purified, and sequenced on a Salus Pro platform  
350 (ShenZhen Salus Biomed Ltd.).

351

352 **NGS preprocessing**

353 Paired-end reads from unselected and selected libraries were merged and quality-filtered  
354 using PEAR and the FASTX Toolkit. Constant 5' and 3' flanking regions were trimmed,  
355 and high-quality merged reads were retained. Identical nucleotide sequences were

356 collapsed into unique records with associated read counts. Technical replicates were  
357 merged by summing counts for identical sequences.

358

### 359 **Fitness estimation**

360 Variant fitness was quantified using a Poisson-based  $\log_2$  enrichment model. Effective  
361 frequencies before and after selection were computed using a pseudocount  $\alpha = 1$ :

$$362 \quad p_i = \frac{n_i + \alpha}{\sum(n_i + \alpha)}$$

363 where  $n_i$  is the number of reads from NGS. After filtering the nucleotide sequences with  
364  $10^{-5}$  from both before and after, the fitness was defined as:

$$365 \quad F_i = \log_2(p_{after,i}) - \log_2(p_{before,i})$$

366 Standard errors were estimated using a delta-method approximation. Variants containing  
367 internal in-frame stop codons served as negative controls to define a null distribution  
368 (median  $\mu_0$  and MAD-derived  $\sigma_0$ ). One-sided  $p$ -values were computed and corrected for  
369 multiple hypothesis testing using the Benjamini–Hochberg procedure.

370 For two independent selection experiments, fitness and  $q$ -values were computed  
371 separately. Variants were classified as functional if they satisfied  $FDR \leq 0.01$  in both  
372 experiments, using the maximum  $q$ -value as the final significance measure. Fitness  
373 values were further normalized as:

$$374 \quad F'_i = \frac{F_i - \mu_0}{\sigma_0}$$

375 to enable cross-replicates comparison.

376

377

378 **In vivo activity assessment of the screened CcdA variants**

379 Nine CcdA variants with different fitness values (Supplementary Table S4) were selected  
380 and cloned into the pUC57-Kan-ccdA/B vector. All sequences were synthesized and  
381 verified by Sanger sequencing at General Biol. For functional assays, 80 ng of each  
382 plasmid was transformed into the ccdB-sensitive *E. coli* strain DH5 $\alpha$ . Transformants  
383 were serially diluted ten-fold, plated on LB agar containing kanamycin, and incubated at  
384 37°C for 20 h. Colony-forming units (CFUs) were enumerated from dilution plates to  
385 assess the in vivo activity of each variant.

386

387 **Supplementary References**

- 388 1. Chen et al., “Navigating Protein Fitness Landscapes Through Simulated Evolutionary  
389 Jumps”, LangTaoSha Preprint Server. (2026).
- 390 2. Seo, Daeje, et al. "A dual gene-specific mutator system installs all transition  
391 mutations at similar frequencies in vivo." *Nucleic Acids Research* 51.10 (2023): e59-  
392 e59.
- 393 3. Moore, Christopher L., Louis J. Papa III, and Matthew D. Shoulders. "A processive  
394 protein chimera introduces mutations across defined DNA regions in vivo." *Journal*  
395 *of the American Chemical Society* 140.37 (2018): 11560-11564.
